# Supplementary material
Source: Copernicus journal article supplement (doi:10.5194/egusphere-2024-1213)

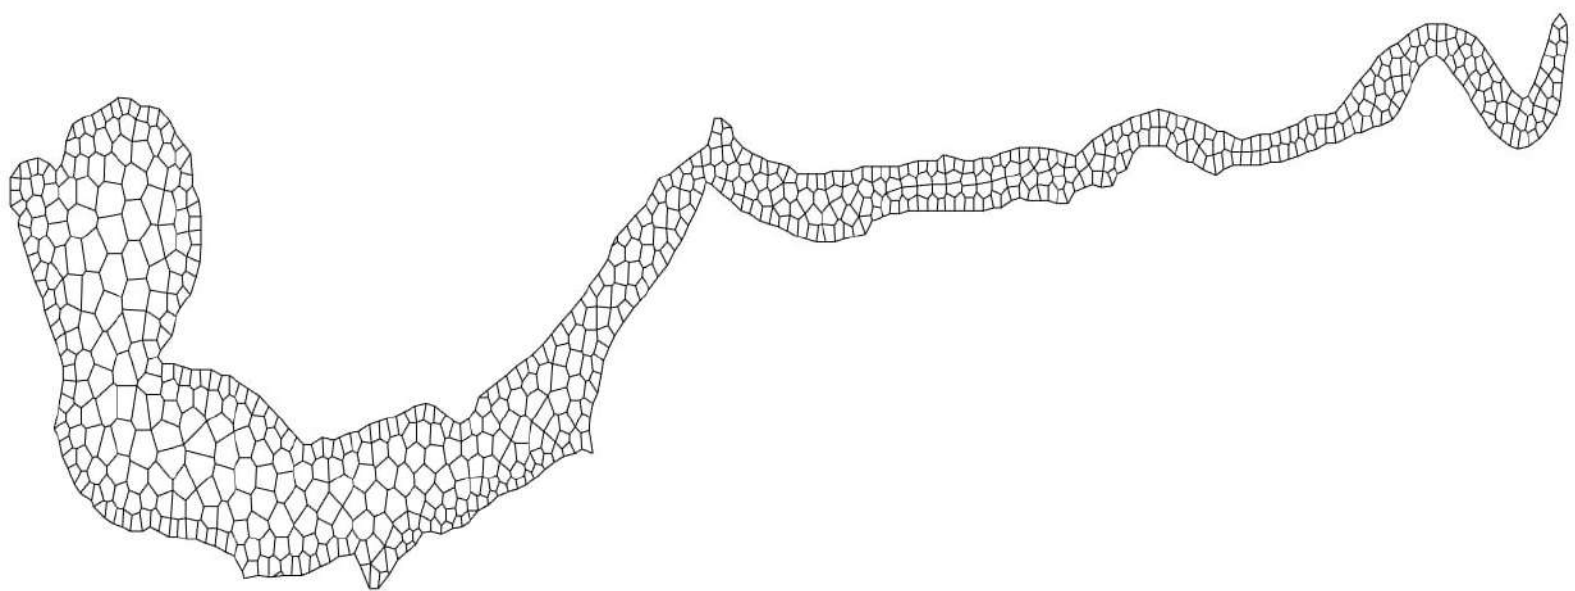

Supplement: Supplementary file [file egusphere-2024-1213-CC3-supplement.pdf]
